# Supplementary material for: Moxibustion as an Adjuvant Therapy for Chronic Kidney Disease: A Systematic Review and Meta‐Analysis of 23 Randomized Controlled Trials
Source: Hindawi journal article supplement (doi:10.1155/2020/6128673), 2020-01-01
Supplement: f1 [file 6128673.f1.pdf]

**Table S1. Search strategy in each database**

| Database                    | Search strategy                                                                                                                                                                                                                                                                                                                                                                                                                                                                                                                                                                                                                                                                                                                                                                                                                                                                                                                                                      |
|-----------------------------|----------------------------------------------------------------------------------------------------------------------------------------------------------------------------------------------------------------------------------------------------------------------------------------------------------------------------------------------------------------------------------------------------------------------------------------------------------------------------------------------------------------------------------------------------------------------------------------------------------------------------------------------------------------------------------------------------------------------------------------------------------------------------------------------------------------------------------------------------------------------------------------------------------------------------------------------------------------------|
| <b>PubMed</b>               | (renal insufficiency, chronic[mh] OR renal replacement therapy[mh] OR diabetic nephropathies[mh] OR nephropathy*[tw] OR renal function*[tw] OR kidney function*[tw] OR renal disease*[tw] OR kidney disease*[tw] OR renal failure*[tw] OR kidney failure*[tw] OR renal insufficien*[tw] OR kidney insufficien*[tw] OR albuminuri*[tw] OR microalbuminuri*[tw] OR macroalbuminuri*[tw] OR proteinuri*[tw] OR albumin excretion*[tw] OR protein excretion*[tw] OR glomerular filtration rate*[tw] OR creatinine*[tw] OR dialy*[tw]) AND (moxibustion [mh] OR moxibustion[tw] OR moxa[tw]) NOT (animals[mh] NOT humans[mh])                                                                                                                                                                                                                                                                                                                                             |
| <b>Embase</b>               | (renal insufficiency, chronic/exp OR renal replacement therapy/exp OR diabetic nephropathy/exp OR nephropathy*:ti,ab OR renal function*:ti,ab OR kidney function*:ti,ab OR renal disease*:ti,ab OR kidney disease*:ti,ab OR renal failure*:ti,ab OR kidney failure*:ti,ab OR renal insufficien*:ti,ab OR kidney insufficien*:ti,ab OR albuminuri*:ti,ab OR microalbuminuri*:ti,ab OR macroalbuminuri*:ti,ab OR proteinuri*:ti,ab OR albumin excretion*:ti,ab OR protein excretion*:ti,ab OR glomerular filtration rate*:ti,ab OR creatinine*:ti,ab OR dialy*:ti,ab) AND (moxibustion/exp OR moxibustion:ti,ab OR moxa:ti,ab)                                                                                                                                                                                                                                                                                                                                         |
| <b>The Cochrane Library</b> | <ol style="list-style-type: none"> <li>1. nephropathy*:ti,ab OR renal function*:ti,ab OR kidney function*:ti,ab OR renal disease*:ti,ab OR kidney disease*:ti,ab OR renal failure*:ti,ab OR kidney failure*:ti,ab OR renal insufficien*:ti,ab OR kidney insufficien*:ti,ab OR albuminuri*:ti,ab OR microalbuminuri*:ti,ab OR macroalbuminuri*:ti,ab OR proteinuri*:ti,ab OR albumin excretion*:ti,ab OR protein excretion*:ti,ab OR glomerular filtration rate*:ti,ab OR creatinine*:ti,ab OR dialy*:ti,ab</li> <li>2. MeSH descriptor: [Renal Insufficiency, Chronic] explode all trees</li> <li>3. MeSH descriptor: [Renal Replacement Therapy] explode all trees</li> <li>4. MeSH descriptor: [Renal Replacement Therapy] explode all trees</li> <li>5. #1 OR #2 OR #3 OR #4</li> <li>6. MeSH descriptor: [Moxibustion] explode all trees</li> <li>7. moxibustion:ti,ab OR moxa:ti,ab</li> <li>8. #6 OR #7</li> <li>9. #5 AND #8 (limited to “trials”)</li> </ol> |
| <b>Clinicaltrials.gov</b>   | Condition or disease: Chronic Kidney Diseases<br>Intervention/treatment: moxibustion                                                                                                                                                                                                                                                                                                                                                                                                                                                                                                                                                                                                                                                                                                                                                                                                                                                                                 |
| <b>SinoMed</b>              | (灸法[主题词] OR 灸[全部字段]) AND (肾脏病[主题词] OR 肾炎[主题词] OR 肾病[全部字段] OR 肾炎[全部字段] OR 肾脏病[全部字段] OR 蛋白尿[全部字段] OR 肌酐[全部字段] OR 透析[全部字段] OR 血透[全部字段] OR 腹透[全部字段])                                                                                                                                                                                                                                                                                                                                                                                                                                                                                                                                                                                                                                                                                                                                                                                                                     |

|                                                  |                                                                          |
|--------------------------------------------------|--------------------------------------------------------------------------|
| <b>Chinese National Knowledge Infrastructure</b> | TI=灸*(肾+蛋白尿+肌酐+透析+血透+腹透) AND AB=灸*(肾病+肾炎+肾脏病+蛋白尿+肌酐+透析+血透+腹透)            |
| <b>WanfangData</b>                               | 主题:灸*("肾病"+"肾炎"+"肾脏病"+"蛋白尿"+"肌酐"+"透析"+"血透"+"腹透")                         |
| <b>VIP</b>                                       | U=灸 AND (U=肾病 OR U=肾炎 OR U=肾脏病 OR U=蛋白尿 OR U=肌酐 OR U=透析 OR U=血透 OR U=腹透) |
| <b>Chinese Clinical Trial Registry</b>           | 研究疾病名称:肾病<br>干预措施:灸                                                      |

**Table S2. Results of subgroup analysis**

| Outcomes                        | Analysis                        | Subgroup                 | Mean difference (95% confidence intervals) | Heterogeneity                | Interaction p |
|---------------------------------|---------------------------------|--------------------------|--------------------------------------------|------------------------------|---------------|
| Serum creatinine                | All patients                    |                          | -17.34 (-28.44, -6.23)                     | I <sup>2</sup> =87%, P<0.001 |               |
|                                 | Stage of chronic kidney disease | Mild to moderate         | -16.97 (-28.33, -5.52)                     | I <sup>2</sup> =90%, P<0.001 | P=0.62        |
|                                 |                                 | Severe                   | -33.41 (-87.99, 25.17)                     | I <sup>2</sup> =0%, P=0.90   |               |
|                                 | Type of moxibustion             | Direct                   | -6.12 (-15.16, 2.93)                       | I <sup>2</sup> =82%, P<0.001 | P=0.007       |
|                                 |                                 | Indirect                 | -66.25 (-108.80, -23.70)                   | I <sup>2</sup> =71%, P=0.02  |               |
|                                 | Length of follow-up             | ≤ 8 weeks                | -2.78 (-9.69, 4.13)                        | I <sup>2</sup> =60%, P=0.02  | P=0.01        |
| > 8 weeks                       |                                 | -58.35 (-102.46, -14.25) | I <sup>2</sup> =84%, P<0.001               |                              |               |
| 24-hour urine protein excretion | All patients                    |                          | -0.75 (-1.07, -0.42)                       | I <sup>2</sup> =84%, P<0.001 |               |
|                                 | Stage of chronic kidney disease | Mild to moderate         | -0.75 (-1.07, -0.42)                       | I <sup>2</sup> =84%, P<0.001 |               |
|                                 |                                 | Severe                   | No studies                                 |                              |               |
|                                 | Type of moxibustion             | Direct                   | -0.82 (-1.32, -0.33)                       | I <sup>2</sup> =89%, P<0.001 | P=0.41        |
|                                 |                                 | Indirect                 | -0.60 (-0.77, -0.43)                       | I <sup>2</sup> =0%, P=0.96   |               |
|                                 | Length of follow-up             | ≤ 8 weeks                | -0.77 (-1.16, -0.38)                       | I <sup>2</sup> =86%, P<0.001 | P=0.40        |
| > 8 weeks                       |                                 | -0.58 (-0.80, -0.36)     | I <sup>2</sup> =0%, P=0.96                 |                              |               |
| Creatinine clearance            | All patients                    |                          | 2.44 (-0.46, 5.35)                         | I <sup>2</sup> =52%, P=0.10  |               |
|                                 | Stage of chronic kidney disease | Mild to moderate         | 4.36 (-5.48, 14.21)                        | I <sup>2</sup> =81%, P=0.02  | P=0.70        |
|                                 |                                 | Severe                   | 2.34 (-0.59, 5.26)                         | I <sup>2</sup> =25%, P=0.26  |               |
|                                 | Type of moxibustion             | Direct                   | 3.87 (0.73, 7.01)                          | I <sup>2</sup> =0%, P=0.56   | P=0.49        |
|                                 |                                 | Indirect                 | 1.96 (-2.53, 6.45)                         | I <sup>2</sup> =65%, P=0.06  |               |
|                                 | Length of follow-up             | ≤ 8 weeks                | 3.42 (-0.12, 6.97)                         | I <sup>2</sup> =50%, P=0.11  | P=0.15        |
| > 8 weeks                       |                                 | -0.01 (-3.09, 3.07)      | Not applicable                             |                              |               |
| Blood urea nitrogen             | All patients                    |                          | -0.63 (-1.09, -0.18)                       | I <sup>2</sup> =37%, P=0.006 |               |
|                                 | Stage of chronic kidney disease | Mild to moderate         | -0.67 (-1.13, -0.20)                       | I <sup>2</sup> =40%, P=0.10  | P=0.34        |
|                                 |                                 | Severe                   | -0.91 (-2.27, 4.09)                        | Not applicable               |               |
|                                 | Type of moxibustion             | Direct                   | -0.62 (-0.80, -0.43)                       | I <sup>2</sup> =0%, P=0.54   | P=0.31        |
|                                 |                                 | Indirect                 | -1.70 (-3.79, 0.40)                        | I <sup>2</sup> =70%, P=0.02  |               |
|                                 | Length of follow-up             | ≤ 8 weeks                | -0.45 (-0.96, 0.06)                        | I <sup>2</sup> =32%, P=0.21  | P=0.19        |
| > 8 weeks                       |                                 | -1.41 (-2.73, -0.08)     | I <sup>2</sup> =48%, P=0.10                |                              |               |

|            |                                 |                  |                     |                            |                            |        |
|------------|---------------------------------|------------------|---------------------|----------------------------|----------------------------|--------|
| Hemoglobin | All patients                    |                  | -0.41 (-3.19, 2.36) | I <sup>2</sup> =0%, P=0.77 |                            |        |
|            | Stage of chronic kidney disease | Mild to moderate | No studies          |                            |                            |        |
|            |                                 | Severe           |                     | -0.41 (-3.19, 2.36)        | I <sup>2</sup> =0%, P=0.77 |        |
|            | Type of moxibustion             | Direct           |                     | -1.06 (-4.15, 2.03)        | I <sup>2</sup> =0%, P=0.82 | P=0.35 |
|            |                                 | Indirect         |                     | 2.30 (-4.02, 8.62)         | Not applicable             |        |
|            | Length of follow-up             | ≤ 8 weeks        |                     | -0.18 (-3.67, 3.30)        | I <sup>2</sup> =0%, P=0.63 | P=0.83 |
| > 8 weeks  |                                 |                  | -0.81 (-5.41, 3.78) | I <sup>2</sup> =0%, P=0.35 |                            |        |

**Table S3. Sensitivity analysis excluding trials with a high risk of bias**

| Outcome                              | Analysis                                       | No. of patients |         | Mean difference (95% confidence intervals) | Heterogeneity                |
|--------------------------------------|------------------------------------------------|-----------------|---------|--------------------------------------------|------------------------------|
|                                      |                                                | Moxibustion     | Control |                                            |                              |
| Serum creatinine                     | Main analysis                                  | 423             | 415     | -17.34 (-28.44, -6.23)                     | I <sup>2</sup> =87%, P=0.002 |
|                                      | <i>Excluding trials with high risk of bias</i> | 265             | 243     | -32.09 (-55.46, -8.72)                     | I <sup>2</sup> =86%, P=0.007 |
| Estimated glomerular filtration rate | Main analysis                                  | 72              | 69      | 1.93 (-14.41, 18.28)                       | I <sup>2</sup> =71%, P=0.82  |
|                                      | <i>Excluding trials with high risk of bias</i> | 72              | 69      | 1.93 (-14.41, 18.28)                       | I <sup>2</sup> =71%, P=0.82  |
| 24-hour urine protein excretion      | Main analysis                                  | 330             | 329     | -0.75 (-1.07, -0.42)                       | I <sup>2</sup> =84%, P<0.001 |
|                                      | <i>Excluding trials with high risk of bias</i> | 170             | 167     | -0.56 (-0.72, -0.40)                       | I <sup>2</sup> =0%, P<0.001  |
| Creatinine clearance                 | Main analysis                                  | 144             | 144     | 2.44 (-0.46, 5.35)                         | I <sup>2</sup> =52%, P=0.10  |
|                                      | <i>Excluding trials with high risk of bias</i> | 84              | 84      | 3.84 (-1.03, 8.72)                         | I <sup>2</sup> =72%, P=0.12  |
| Blood urea nitrogen                  | Main analysis                                  | 335             | 327     | -0.63 (-1.09, -0.18)                       | I <sup>2</sup> =37%, P=0.006 |
|                                      | <i>Excluding trials with high risk of bias</i> | 128             | 140     | -0.96 (-2.96, 1.03)                        | I <sup>2</sup> =69%, P=0.34  |
| Hemoglobin                           | Main analysis                                  | 207             | 194     | -0.41 (-3.19, 2.36)                        | I <sup>2</sup> =0%, P=0.77   |
|                                      | <i>Excluding trials with high risk of bias</i> | 147             | 134     | -1.17 (-4.84, 2.50)                        | I <sup>2</sup> =0%, P=0.53   |

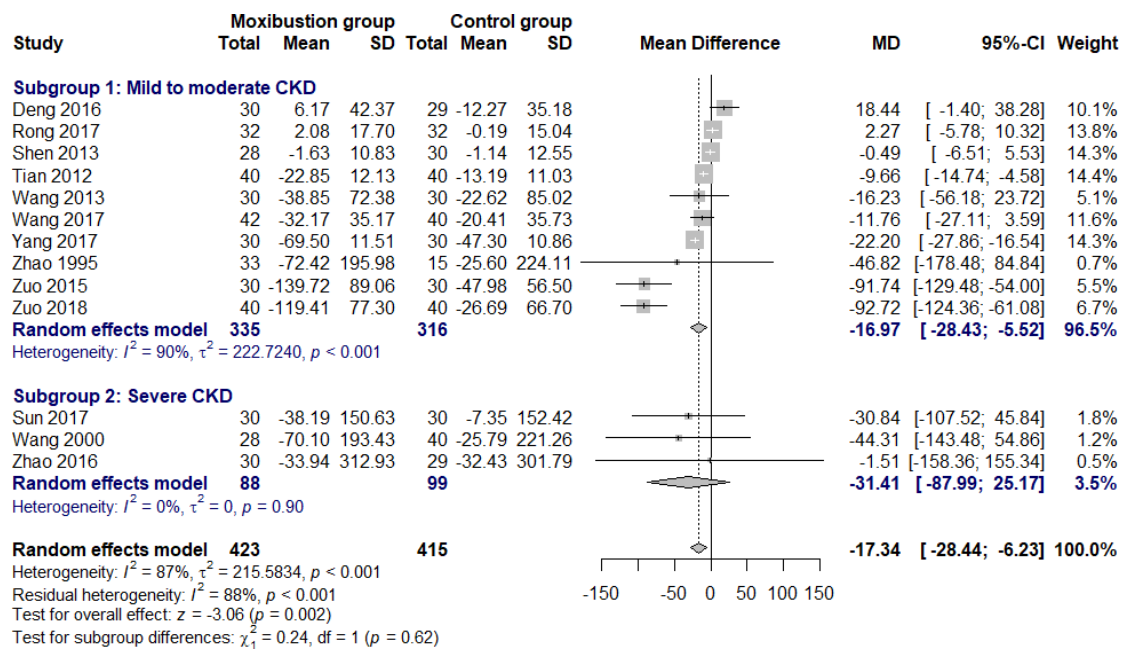

Figure S1. Subgroup analysis stratified by different stage of moxibustion for changes in serum creatinine ( $\mu\text{mol/L}$ )

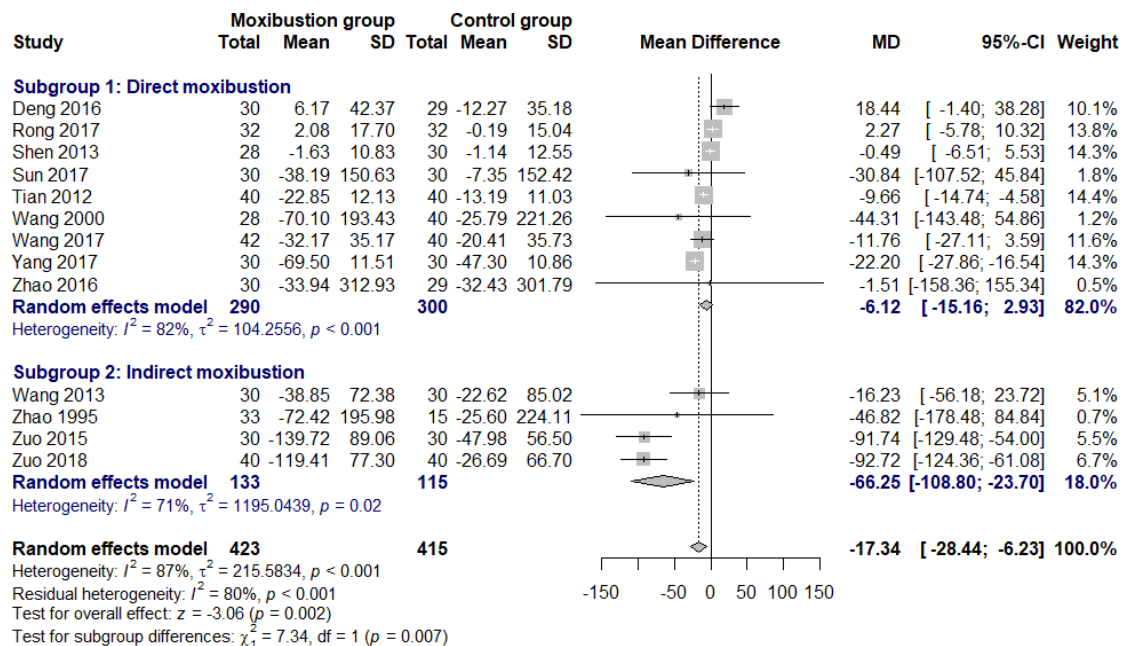

Figure S2. Subgroup analysis stratified by different type of moxibustion for changes in serum creatinine ( $\mu\text{mol/L}$ )

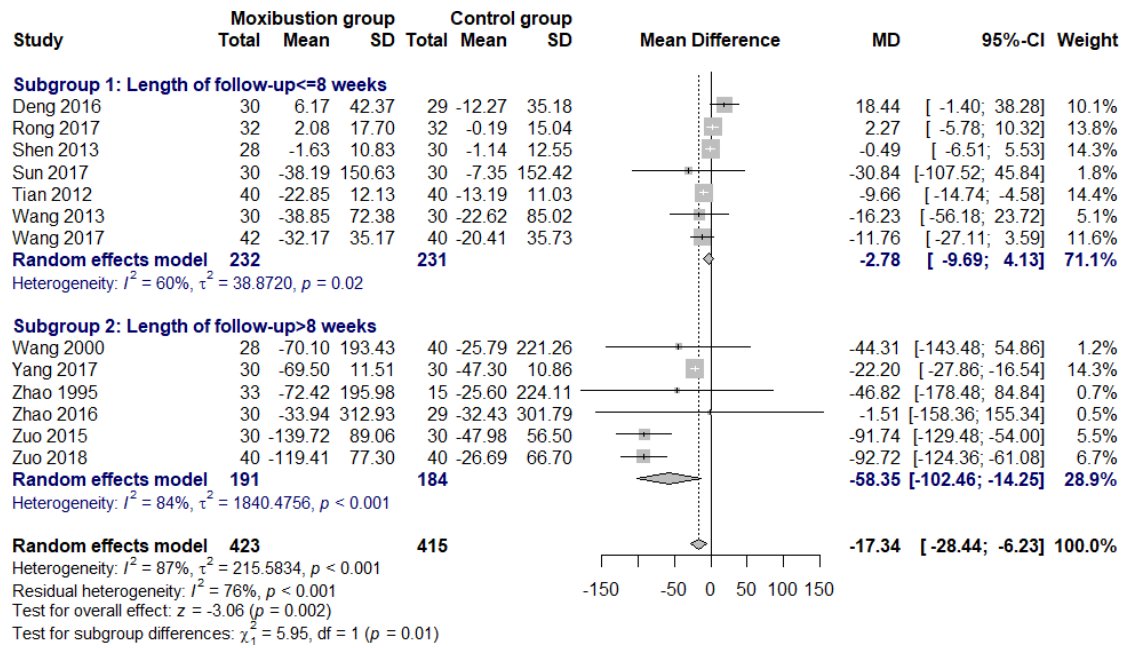

Figure S3. Subgroup analysis stratified by different follow-up of moxibustion for changes in serum creatinine ( $\mu\text{mol/L}$ )

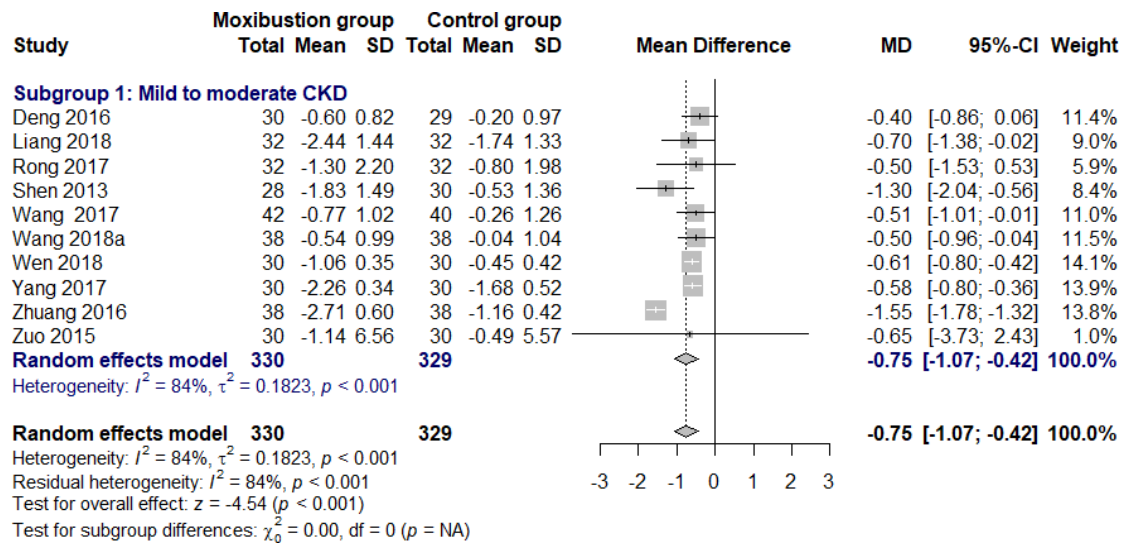

Figure S4. Subgroup analysis stratified by different stage of moxibustion for changes in 24-hour urine protein excretion (g/h)

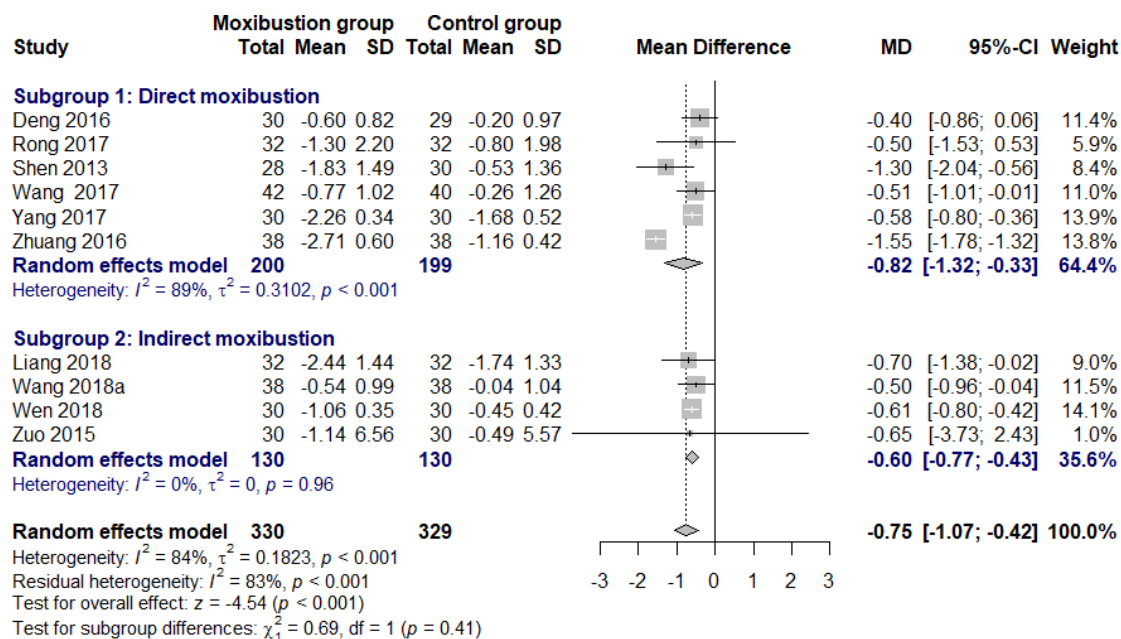

Figure S5. Subgroup analysis stratified by different type of moxibustion for changes in 24-hour urine protein excretion (g/h)

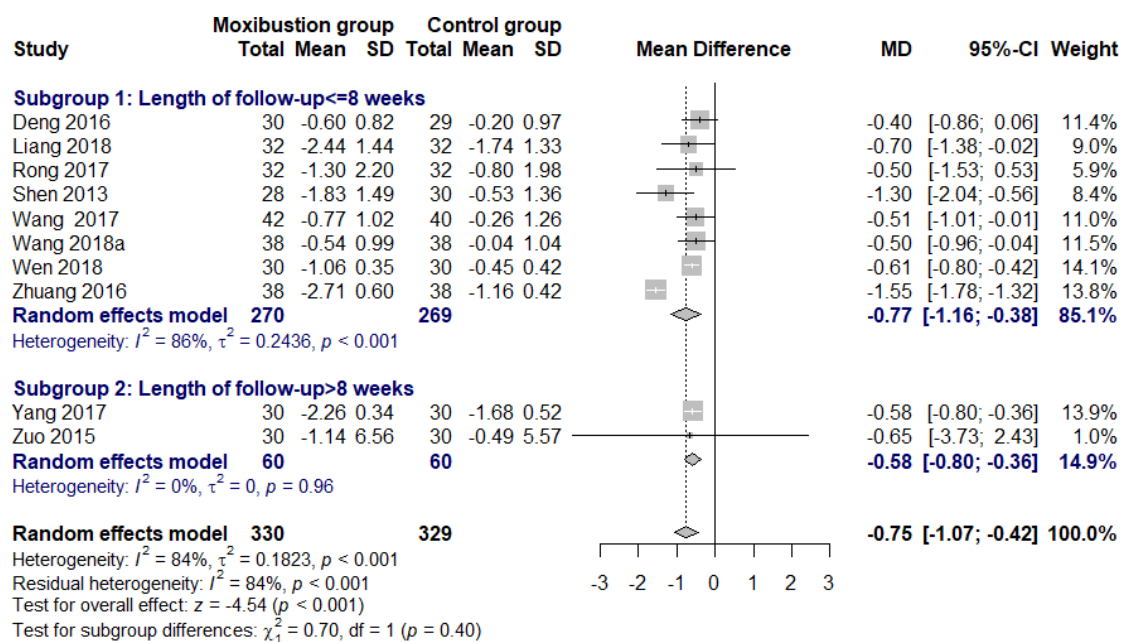

Figure S6. Subgroup analysis stratified by different follow-up of moxibustion for changes in 24-hour urine protein excretion (g/h)

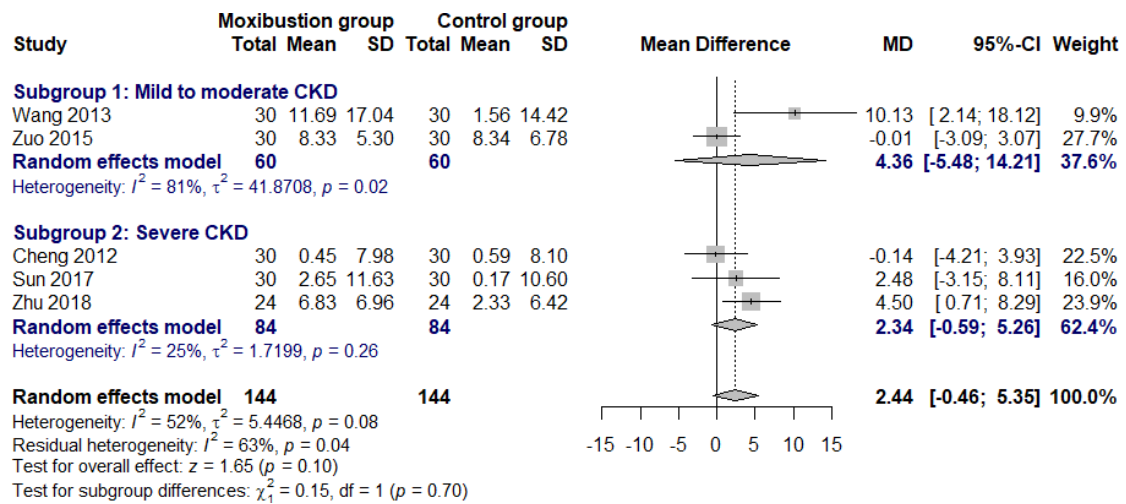

Figure S7. Subgroup analysis stratified by different stage of moxibustion for changes in creatinine clearance (mL/min)

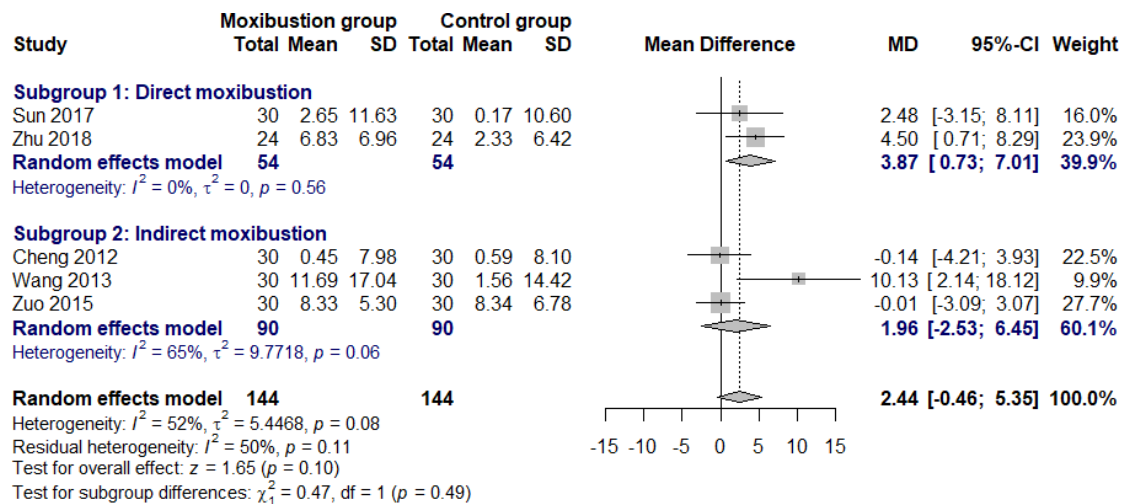

Figure S8. Subgroup analysis stratified by different type of moxibustion for changes in creatinine clearance (mL/min)

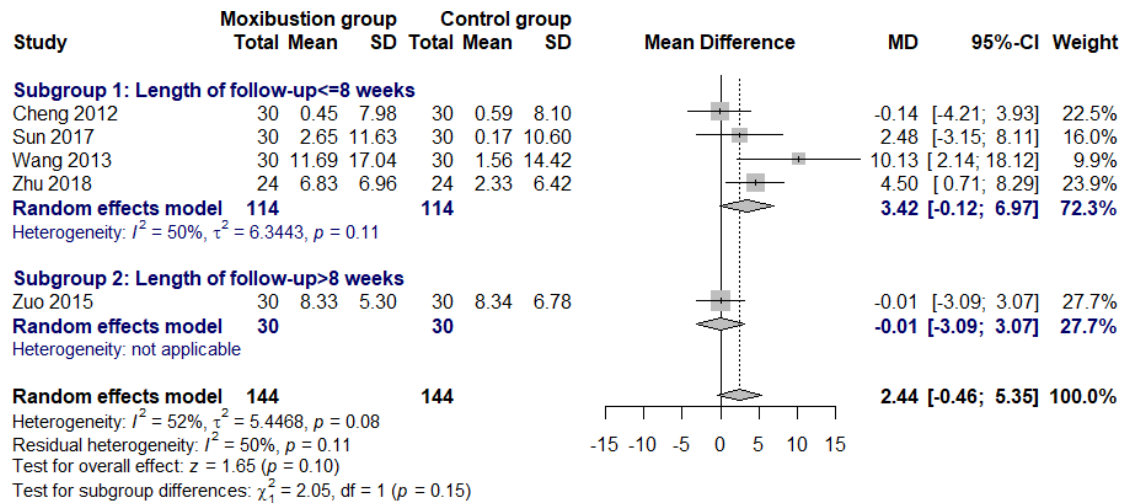

Figure S9. Subgroup analysis stratified by different follow-up of moxibustion for changes in creatinine clearance (mL/min)

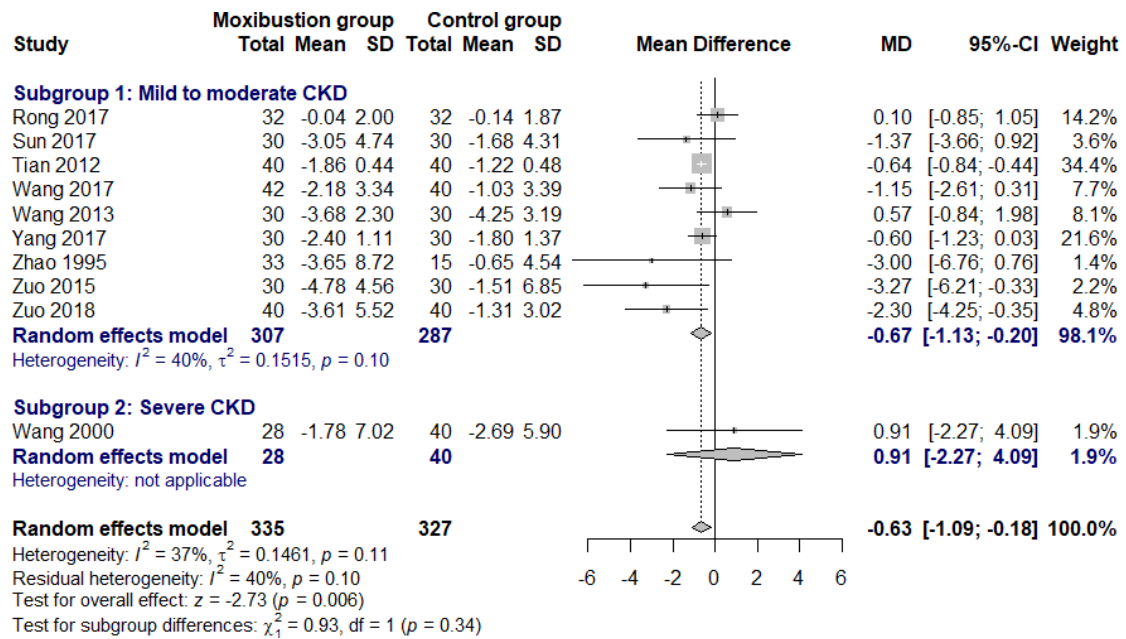

Figure S10. Subgroup analysis stratified by different stage of moxibustion for changes in blood urea nitrogen (mmol/L)



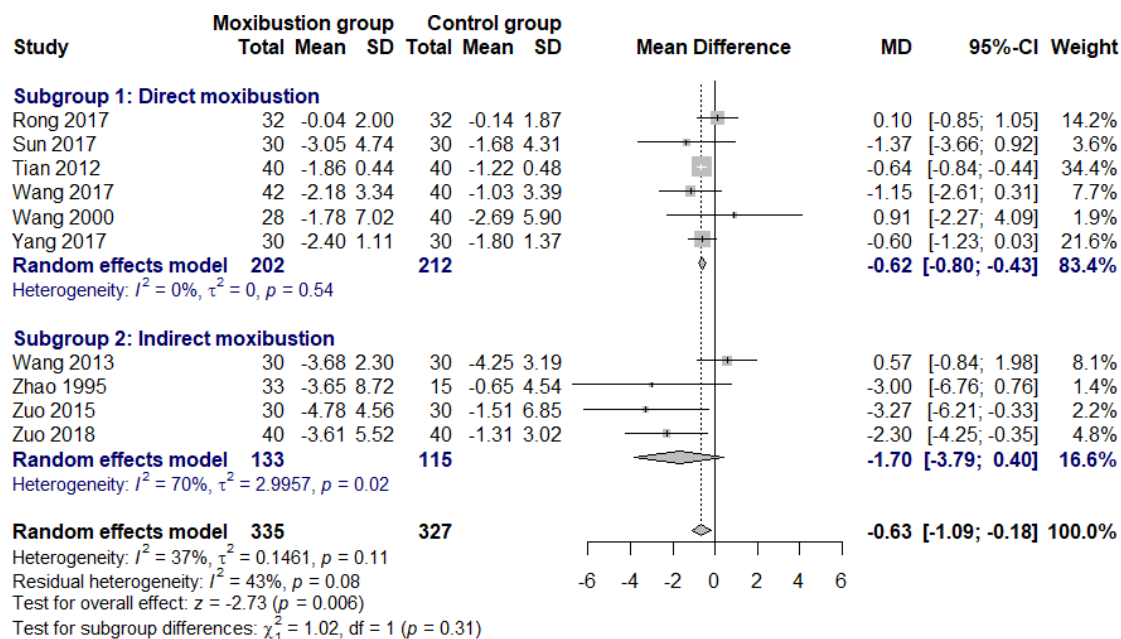

Figure S11. Subgroup analysis stratified by different type of moxibustion for changes in blood urea nitrogen (mmol/L)

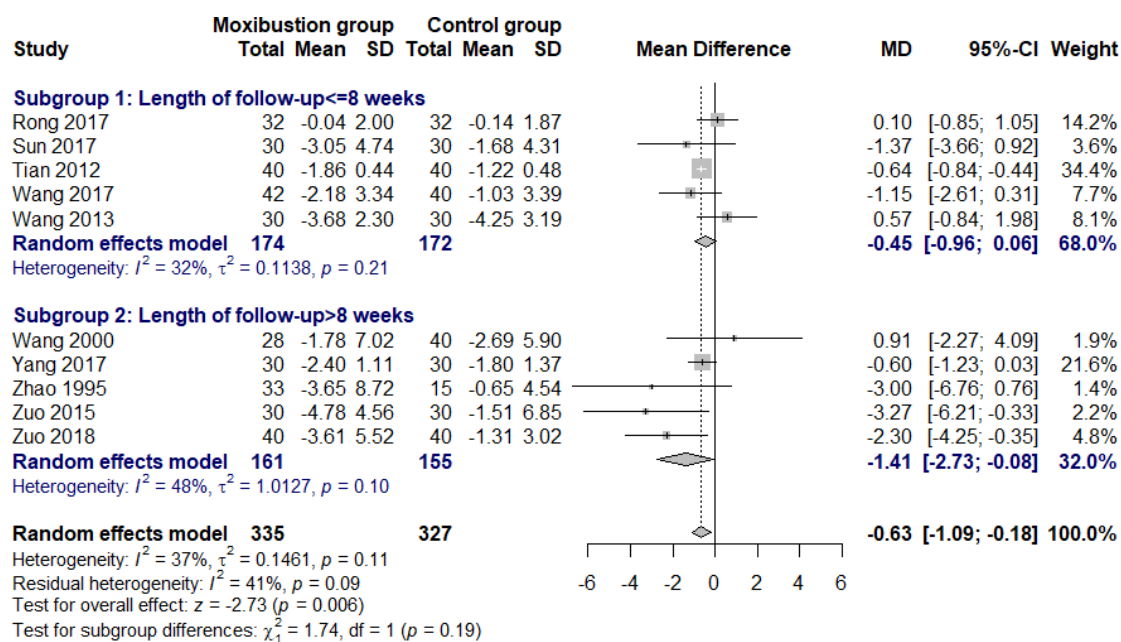

Figure S12. Subgroup analysis stratified by different follow-up of moxibustion for changes in blood urea nitrogen (mmol/L)

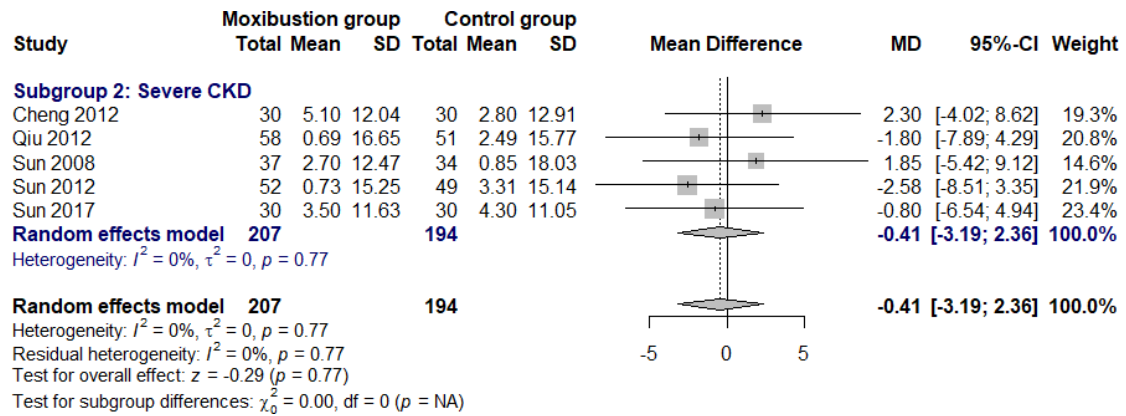

Figure S13. Subgroup analysis stratified by different stage of moxibustion for changes in hemoglobin (g/L)

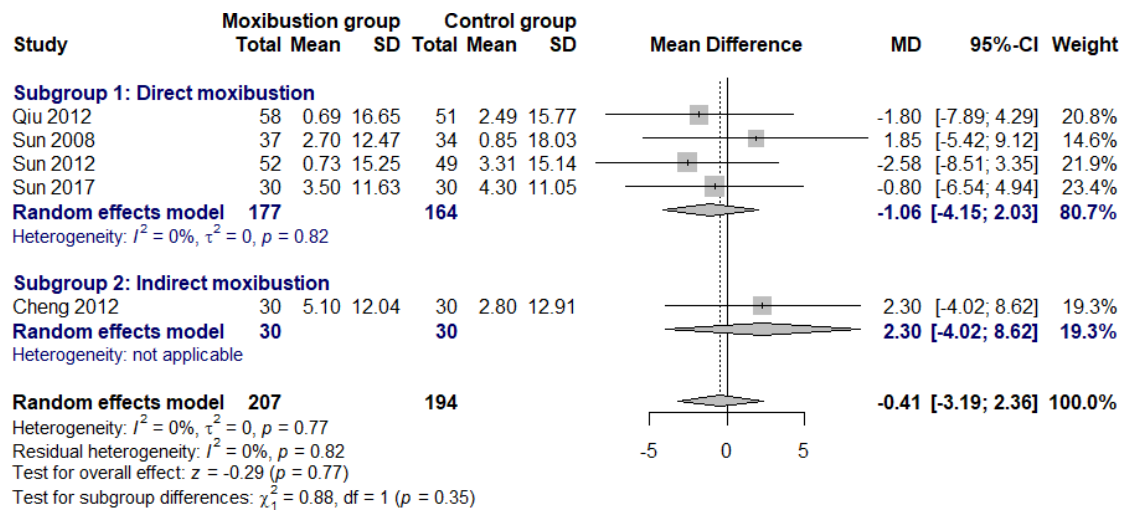

Figure S14. Subgroup analysis stratified by different type of moxibustion for changes in hemoglobin (g/L)

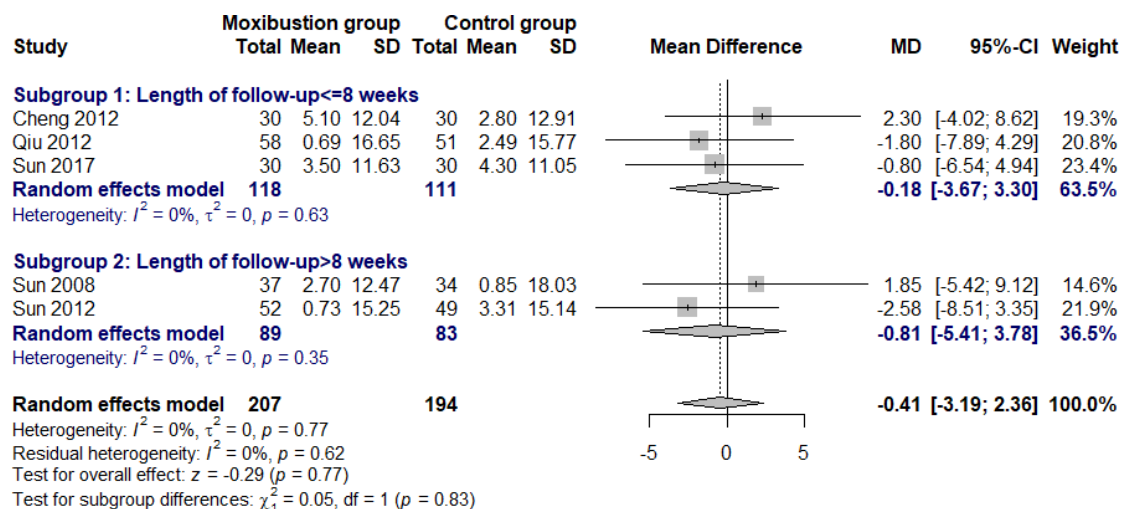

Figure S15. Subgroup analysis stratified by different follow-up of moxibustion for changes in hemoglobin (g/L)

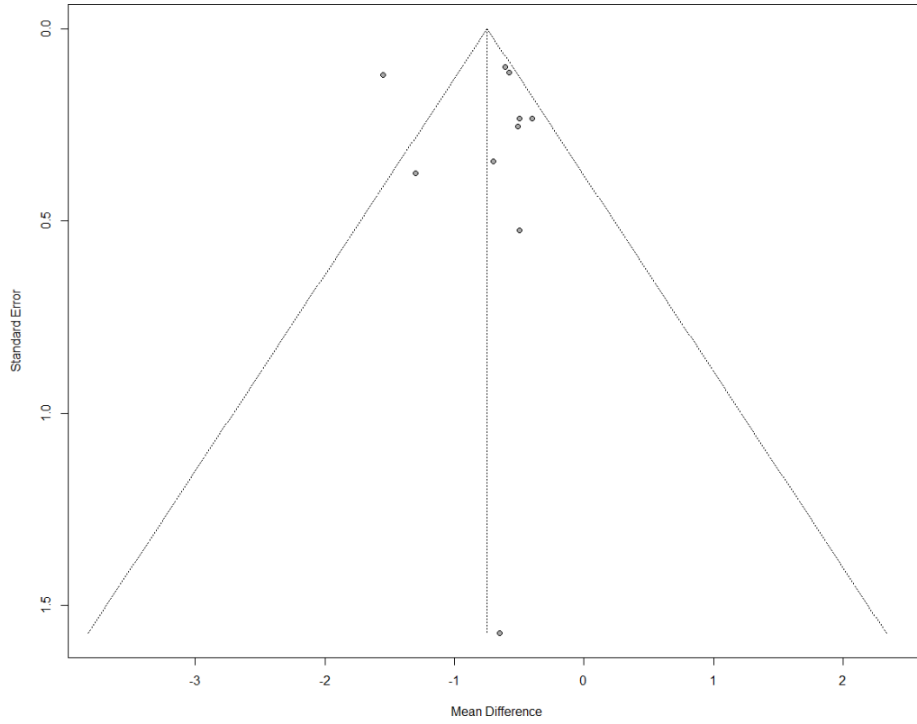

Figure S16. Funnel plot of 24-hour urine protein excretion

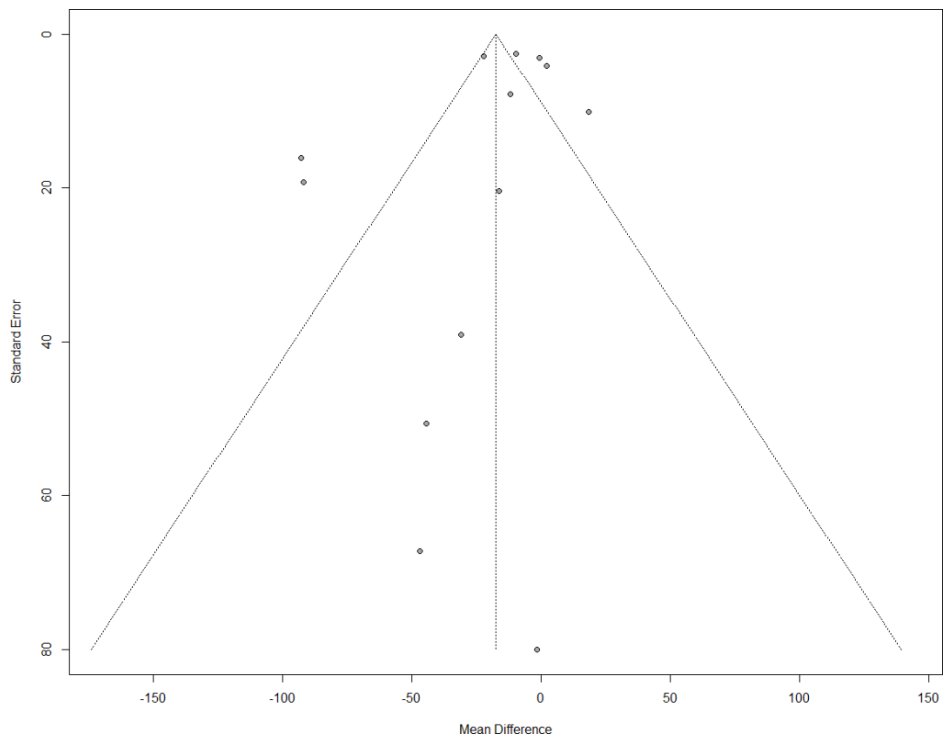

Figure S17. Funnel plot of serum creatinine

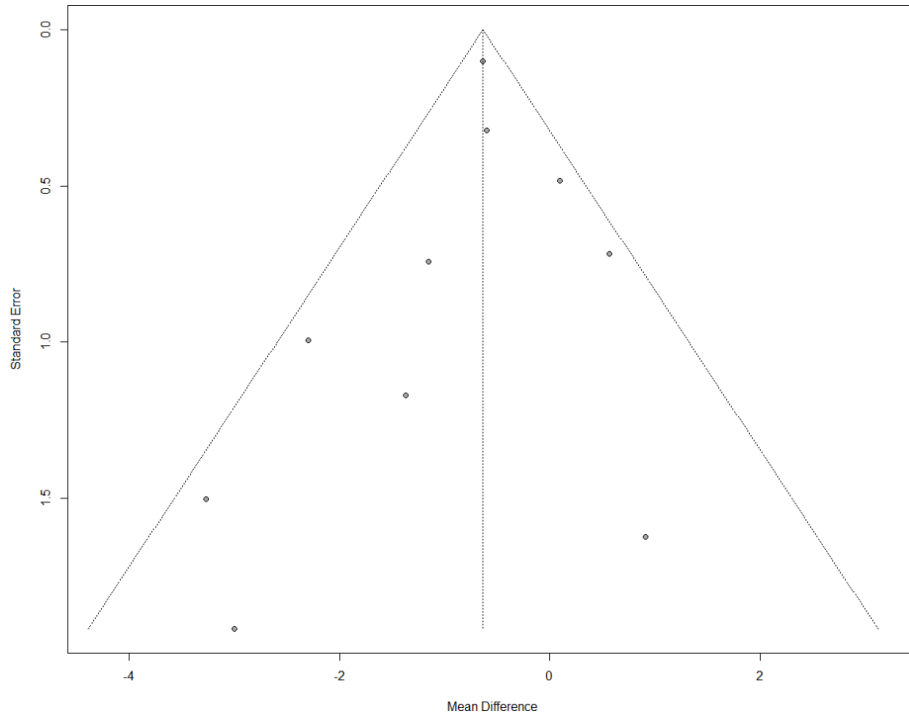

Figure S18. Funnel plot of blood urea nitrogen
